# Supplementary material for: Antibiotics alter development and gene expression in the model cnidarian Nematostella vectensis
Source: PeerJ journal article supplement (doi:10.7717/peerj.17349), 2024-05-20

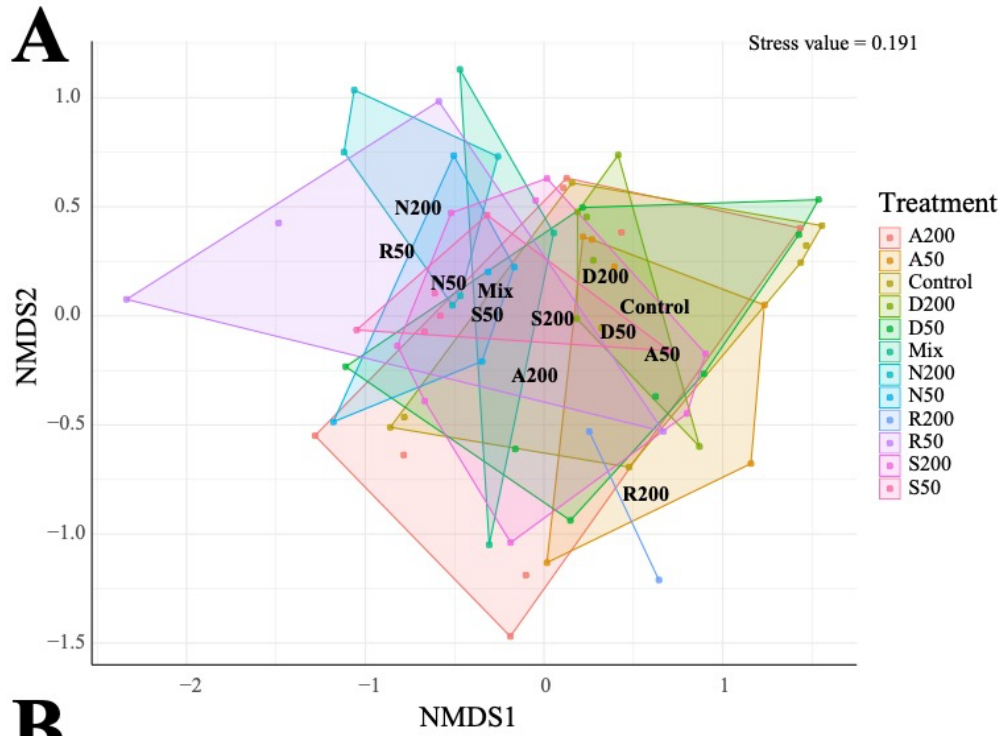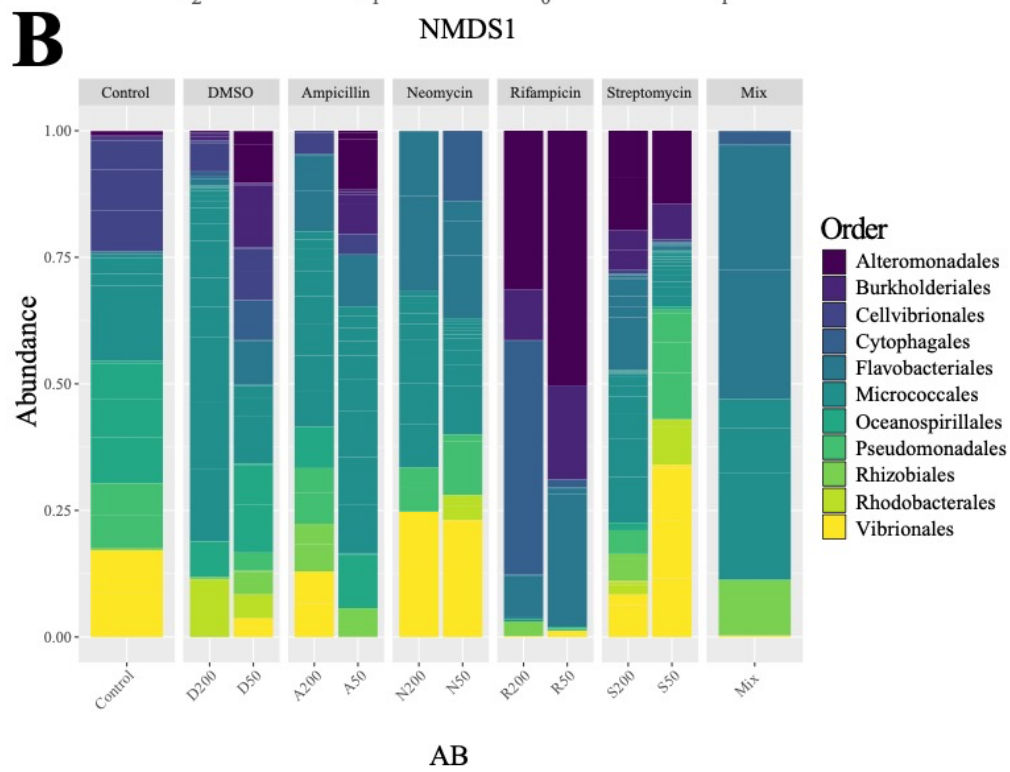

Supplement: S_Figure1.pdf [file S_Figure1.pdf]
