# Supplementary material for: Antibiotics alter development and gene expression in the model cnidarian Nematostella vectensis
Source: PeerJ journal article supplement (doi:10.7717/peerj.17349), 2024-05-20

### A - NTC AB BP

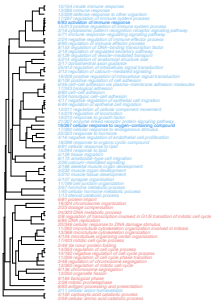

### B - NTC AB MF

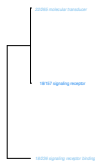

### C - NTC AB CC

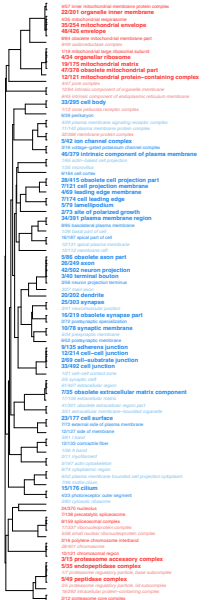

### D - NTC ABC MF

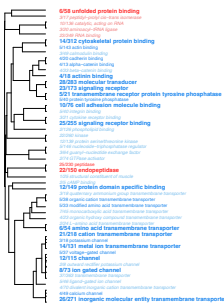

### E - NTC ABC CC

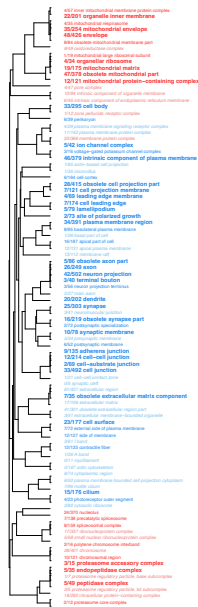

### F - NTC ABC BP

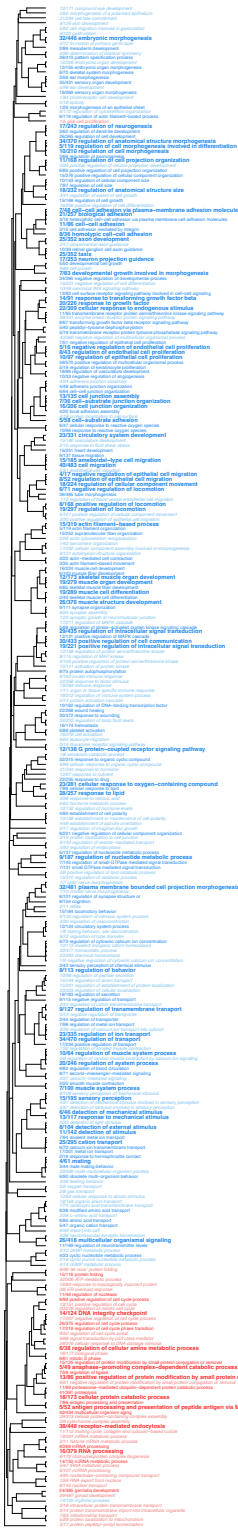

### G - AB ABC BP

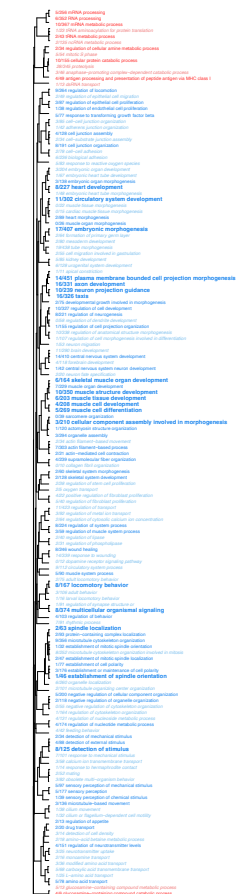

p < 0.001  
p < 0.01  
p < 0.05

### H - AB ABC MF

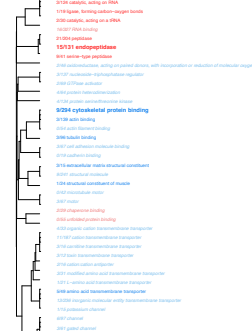

### I - AB ABC CC

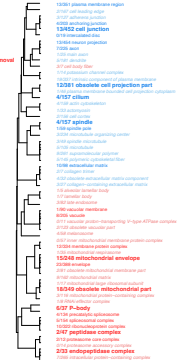

Supplement: S_Figure4.pdf [file S_Figure4.pdf]
