# Supplementary material for: Antibiotics alter development and gene expression in the model cnidarian Nematostella vectensis
Source: PeerJ. 2024 May 20;12:e17349. doi: 10.7717/peerj.17349 (PMC11114123; doi:10.7717/peerj.17349)
Supplement: Supplemental Information 5 [file peerj-12-17349-s005.xlsx]

## Sheet: Sheet1
D200-2-E3	27080	D50-3-E2	19899
C3-E2	26923	S200-1-E1	19718
D50-2-E3	24493	D200-3-E2	19634
A200-3-E1	24101	D50-2-E2	19546
C2-E2	24053	S200-2-E2	19427
S50-1-E1	23775	S200-1-E3	19192
S200-2-E1	23604	D50-1-E1	19149
MIX-2-E1	23402	D200-1-E3	19082
S50-2-E3	23132	A50-2-E3	19061
C2-E3	23042	N50-1-E1	18805
R200-2-E1	22987	A200-2-E2	18736
R50-2-E3	22712	A50-2-E1	18685
S200-1-E2	22603	N200-1-E3	18652
A200-1-E1	22504	A200-2-E1	18516
A50-1-E3	22462	C3-E3	18341
S50-3-E3	22439	S50-3-E1	18068
MIX-1-E1	22292	R200-1-E1	17818
D50-1-E3	22107	A200-1-E2	17720
A50-1-E1	21820	R50-1-E1	17251
N200-1-E1	21486	A50-3-E3	16778
D200-1-E2	21470	S200-3-E1	16584
C1-E1	21195	S200-2-E3	16288
D50-1-E2	21120	R50-1-E3	15998
C2-E1	20964	N50-2-E3	15911
R50-3-E3	20646	A50-3-E1	15229
N200-2-E2	20480	S50-1-E2	15186
D200-3-E3	20462	N200-2-E1	15105
A200-1-E3	20429	A200-3-E3	14363
S50-2-E1	20312	N50-2-E1	13906
D200-2-E2	20304	MIX-1-E2	13590
N50-1-E3	20289	C1-E3	12768
N50-3-E3	20131	A200-2-E3	12395
C1-E2	20128	D50-3-E3	11889
D50-2-E1	19990	N200-3-E1	10884
S200-3-E3	19959
