# Supplementary material for: Antibiotics alter development and gene expression in the model cnidarian Nematostella vectensis
Source: PeerJ. 2024 May 20;12:e17349. doi: 10.7717/peerj.17349 (PMC11114123; doi:10.7717/peerj.17349)
Supplement: Supplemental Information 6 — Raw data for Figs. 1 and 2, where Raw Data Table 1 contains settlement raw data. Proportion of Nematostella vectensis that successfully settle (n = 20). Data Table 2 contains the days to turbidity. [file peerj-12-17349-s006.xlsx]

## Sheet: Proportion - Days to Settlement
Treatment	Day1	Day2	Day3	Day4	Day5	Day6	Day7	Day8	Day9
Control	0	0	0	0	0.8	1	1	1	1
Control	0	0	0	0	0.6	0.6	1	1	1
Control	0	0	0	0	0.6	1	1	1	1
Control	0	0	0	0	0.6	1	1	1	1
DMSO50	0	0	0	0	0.6	1	1	1	1
DMSO50	0	0	0	0	0.2	0.6	1	1	1
DMSO50	0	0	0	0	0.6	0.8	1	1	1
DMSO50	0	0	0	0	0.8	0.8	0.8	1	1
DMSO200	0	0	0	0	0.4	0.6	1	1	1
DMSO200	0	0	0	0	0.6	0.8	1	1	1
DMSO200	0	0	0	0	0.2	0.4	1	1	1
DMSO200	0	0	0	0	0.6	0.6	1	1	1
Amp50	0	0	0	0	0.2	0.6	1	1	1
Amp50	0	0	0	0	0.8	1	1	1	1
Amp50	0	0	0	0	0.2	0.4	0.8	1	1
Amp50	0	0	0	0	0.6	0.8	1	1	1
Amp200	0	0	0	0	1	1	1	1	1
Amp200	0	0	0	0	0.4	0.6	0.8	1	1
Amp200	0	0	0	0	0.6	0.6	1	1	1
Amp200	0	0	0	0	0.4	0.8	1	1	1
Strep50	0	0	0	0	0.4	1	1	1	1
Strep50	0	0	0	0	0.2	1	1	1	1
Strep50	0	0	0	0	0.2	0.4	0.8	1	1
Strep50	0	0	0	0	0	0.2	0.8	1	1
Strep200	0	0	0	0	0.2	0.8	1	1	1
Strep200	0	0	0	0	0.6	0.6	1	1	1
Strep200	0	0	0	0	0.2	0.8	1	1	1
Strep200	0	0	0	0	0.4	0.8	1	1	1
Rif50	0	0	0	0	0	0	0.8	1	1
Rif50	0	0	0	0	0.2	0.4	1	1	1
Rif50	0	0	0	0	0	0.2	0.8	0.8	1
Rif50	0	0	0	0	0	0.2	0.8	1	1
Rif200	0	0	0	0	0	0.2	0.8	1	1
Rif200	0	0	0	0	0	0.2	0.8	1	1
Rif200	0	0	0	0	0	0.2	0.4	0.8	1
Rif200	0	0	0	0	0	0	0.6	1	1
Neo50	0	0	0	0	0	0.2	0.8	1	1
Neo50	0	0	0	0	0.2	0.2	0.4	0.8	1
Neo50	0	0	0	0	0	0.2	0.4	0.6	1
Neo50	0	0	0	0	0	0	0.6	1	1
Neo200	0	0	0	0	0	0	0.2	0.8	1
Neo200	0	0	0	0	0	0.2	0.2	0.8	1
Neo200	0	0	0	0	0.2	0.2	0.2	0.8	1
Neo200	0	0	0	0	0	0	0.2	0.6	0.8
Combined	0	0	0	0	0.2	0.2	0.2	0.8	1
Combined	0	0	0	0	0	0.2	0.4	0.8	1
Combined	0	0	0	0	0.2	0.2	0.4	0.8	1
Combined	0	0	0	0	0	0	0	0.4	0.8

## Sheet: Days to Turbidity
Control			DMSO50			DMSO200			Amp50			Amp200			Strep50			Strep200			Rif50			Rif200			Neo50			Neo200			Combined
1	1		2	1	2				1	1	1	2	1	2	2	2	3	2	3	3	3			5	6		4	4	5	7	5	5	3	5
1	2	1	1	3	2	2	2	3	1	2	2	1		1	4			3	4		2						3	5		6			6
1	1	2	2	1	2	1	2	3	1	1	2	2	2	1		4	4	4	3	3	3	4	5				5	6	4	4
